# Supplementary material for: Analysis of the Psychosocial Impact of the COVID-19 Pandemic on the Nursing Staff of the Intensive Care Units (ICU) in Spain
Source: Healthcare (Basel). 2022 Apr 25;10(5):796. doi: 10.3390/healthcare10050796 (PMC9141599; doi:10.3390/healthcare10050796)
Supplement: Supplementary file 1 [file healthcare-10-00796-s001.zip › healthcare-1668137-supplementary.pdf]

## Supplementary Material

### Annex I—Questionnaire

|                                                                                                                         |                                                                                                                                                                  |
|-------------------------------------------------------------------------------------------------------------------------|------------------------------------------------------------------------------------------------------------------------------------------------------------------|
| <b>Socio-demographic data</b>                                                                                           |                                                                                                                                                                  |
| Age                                                                                                                     | Short answer text: Insert age in number.                                                                                                                         |
| Sex                                                                                                                     | <ul style="list-style-type: none"><li>○ Man</li><li>○ Woman</li><li>○ I prefer not to say</li></ul>                                                              |
| Please indicate in which hospital you worked in the ICU during the pandemic (you can select more than one)              | Short answer text                                                                                                                                                |
| Please indicate in which wave of the pandemic you have worked in the Intensive Care Unit (you can select more than one) | <ul style="list-style-type: none"><li>○ First wave</li><li>○ Second wave</li><li>○ Third-wave</li><li>○ All</li></ul>                                            |
| Employment relationship                                                                                                 | <ul style="list-style-type: none"><li>○ Temporary</li><li>○ Fixed</li><li>○ Interim</li></ul>                                                                    |
| <b>Perceptions of working conditions during the pandemic</b>                                                            |                                                                                                                                                                  |
| What do you consider your level of exposure has been within the unit? *                                                 | <ul style="list-style-type: none"><li>○ No or very low grade</li><li>○ Low grade</li><li>○ Medium grade</li><li>○ High grade</li><li>○ Very high grade</li></ul> |
| Do you believe that you have been provided with adequate working                                                        | <ul style="list-style-type: none"><li>○ Yes</li></ul>                                                                                                            |

|                                                                                                                                                |                                                                                                                                                                                                      |
|------------------------------------------------------------------------------------------------------------------------------------------------|------------------------------------------------------------------------------------------------------------------------------------------------------------------------------------------------------|
| conditions to cope with the situation since the beginning of the pandemic? *                                                                   | <ul style="list-style-type: none"> <li>○ No</li> </ul>                                                                                                                                               |
| If not, do you think it has subsequently changed?                                                                                              | <ul style="list-style-type: none"> <li>○ Yes</li> <li>○ No</li> </ul>                                                                                                                                |
| Have you been provided with all the assistance needed, both material and personnel? *                                                          | <ul style="list-style-type: none"> <li>○ Yes</li> <li>○ No</li> </ul>                                                                                                                                |
| Do you think our healthcare system was prepared for this situation? *                                                                          | <ul style="list-style-type: none"> <li>○ Yes</li> <li>○ No</li> </ul>                                                                                                                                |
| Why do you think so?                                                                                                                           | Long answer text                                                                                                                                                                                     |
| <b>Perception of mental health status</b>                                                                                                      |                                                                                                                                                                                                      |
| Have you felt more worried (either about your or your family's health, work, or anything related to the pandemic)? *                           | <ul style="list-style-type: none"> <li>○ No, I have not been worried.</li> <li>○ Just as worried as ever.</li> <li>○ Somewhat more worried than usual.</li> <li>○ Much more worried.</li> </ul>      |
| Have you felt more tired? *                                                                                                                    | <ul style="list-style-type: none"> <li>○ No, I have never felt tired.</li> <li>○ Just as tired as ever.</li> <li>○ Slightly more tired than usual.</li> <li>○ Much more tired than usual.</li> </ul> |
| Have you had sleep problems? *                                                                                                                 | <ul style="list-style-type: none"> <li>○ No, I have never had any sleep problems.</li> <li>○ The same as always.</li> <li>○ Somewhat more than usual.</li> <li>○ Much more than usual.</li> </ul>    |
| Have you ever felt fear? To what degree? *Understand fear as the fear you feel when considering something harmful, such as returning home with | <ul style="list-style-type: none"> <li>○ No, I have never been afraid.</li> <li>○ Yes, to the same extent as always.</li> <li>○ Yes, a little more than usual.</li> </ul>                            |

|                                                                                                                                                                                                                                                                 |                                                                                                                                                                                           |
|-----------------------------------------------------------------------------------------------------------------------------------------------------------------------------------------------------------------------------------------------------------------|-------------------------------------------------------------------------------------------------------------------------------------------------------------------------------------------|
| the possibility of infecting other people, fear of the unknown... *                                                                                                                                                                                             | <ul style="list-style-type: none"> <li>○ Yes, much more than usual.</li> </ul>                                                                                                            |
| Indicate the degree to which you have felt anxiety. *Anxiety is the mental state of anguish and alertness that occurs in the face of a threat and is characterised by great restlessness, excitement and insecurity. *                                          | <ul style="list-style-type: none"> <li>○ I have never felt anxiety.</li> <li>○ The same as always.</li> <li>○ Somewhat more than usual.</li> <li>○ Much more than usual.</li> </ul>       |
| Do you consider that you have suffered from psychological stress? To what degree? *Psychological stress is defined as negative or unpleasant emotional reactions to a situation of excessive demand. These reactions are often anger, anxiety and depression. * | <ul style="list-style-type: none"> <li>○ No, I have never felt it.</li> <li>○ I felt the same as always.</li> <li>○ Somewhat more than usual.</li> <li>○ Much more than usual.</li> </ul> |
| Have you ever felt down, depressed or hopeless? *                                                                                                                                                                                                               | <ul style="list-style-type: none"> <li>○ Yes.</li> <li>○ No.</li> </ul>                                                                                                                   |
| Have you had times when you felt you had lost your vocation or even considered quitting your job? *                                                                                                                                                             | <ul style="list-style-type: none"> <li>○ Yes.</li> <li>○ No.</li> </ul>                                                                                                                   |
| Could you tell what feeling or psychological state has characterised each pandemic wave for you?                                                                                                                                                                | Long answer text.                                                                                                                                                                         |
| Are you aware of the counselling services offered in your hospital to professionals? *                                                                                                                                                                          | <ul style="list-style-type: none"> <li>○ Yes.</li> <li>○ No.</li> </ul>                                                                                                                   |
| Have you had to seek psychological or psychiatric help? *                                                                                                                                                                                                       | <ul style="list-style-type: none"> <li>○ Yes.</li> <li>○ No.</li> <li>○ No, but I think I need it.</li> </ul>                                                                             |
| Has the use of psychotropic medicines increased? *                                                                                                                                                                                                              | <ul style="list-style-type: none"> <li>○ No, I consume the same as always.</li> <li>○ Yes.</li> <li>○ I have never used it.</li> </ul>                                                    |

|                                                                                                                                                                                                 |                                                                                                                                                                      |
|-------------------------------------------------------------------------------------------------------------------------------------------------------------------------------------------------|----------------------------------------------------------------------------------------------------------------------------------------------------------------------|
| <b>Life events</b>                                                                                                                                                                              |                                                                                                                                                                      |
| Have you experienced any other traumatic events related to the pandemic (such as your own or a family member's infection, someone close to you being hospitalised or dying from COVID-19...)? * | <input type="radio"/> Yes.<br><input type="radio"/> No.                                                                                                              |
| Has the COVID-19 virus infected you? *                                                                                                                                                          | <input type="radio"/> Yes.<br><input type="radio"/> No.                                                                                                              |
| <b>Social relations</b>                                                                                                                                                                         |                                                                                                                                                                      |
| Have you experienced fear of infecting your immediate family/social environment? *                                                                                                              | <input type="radio"/> Yes.<br><input type="radio"/> No.                                                                                                              |
| Do you have people at risk of COVID-19 in your immediate environment? *                                                                                                                         | <input type="radio"/> Yes.<br><input type="radio"/> No.                                                                                                              |
| Are you a risk person?                                                                                                                                                                          | <input type="radio"/> Yes.<br><input type="radio"/> No.                                                                                                              |
| Have you changed your behaviour towards those close to you, or even felt compelled to take isolation measures? *                                                                                | <input type="radio"/> Yes.<br><input type="radio"/> No.                                                                                                              |
| Do you feel that your relationships have been affected by the situation you have faced? *                                                                                                       | <input type="radio"/> Yes.<br><input type="radio"/> No.                                                                                                              |
| <b>Labour relations</b>                                                                                                                                                                         |                                                                                                                                                                      |
| How has the relationship with your colleagues been? *                                                                                                                                           | <input type="radio"/> Better, we worked as a team, and I felt supported.<br><input type="radio"/> Same as ever, no better, no worse.<br><input type="radio"/> Worse. |
| Do you think this has harmed your work performance and, therefore, the quality of patient care? *                                                                                               | <input type="radio"/> Yes.<br><input type="radio"/> No.                                                                                                              |

Have you experienced difficulties in focusing on your work? \*

- ☐ Yes.
- ☐ No.
